# Supplementary material for: Observation of mutual diffusion of macromolecules in PS/PMMA binary films by confocal Raman microscopy
Source: Royal Society of Chemistry journal article supplement (doi:10.1039/c2sm07299h), 2012-01-01
Supplement: c2sm07299h.pdf [file c2sm07299h.pdf]

## Supplementary Information

# Observation of Mutual Diffusion of Macromolecules in PS/PMMA Binary Film by Confocal Raman Microscopy

Chenglong Hu,<sup>a</sup> Xudong Chen,<sup>\*a</sup> Jian Chen,<sup>b</sup> Weihong Zhang,<sup>b</sup> and Ming Qiu Zhang<sup>\*a</sup>

<sup>a</sup>Key Laboratory for Polymeric Composite and Functional Materials of Ministry of Education, DSAPM Lab, School of Chemistry and Chemical Engineering, Sun Yat-sen University, Guangzhou 510275, China.

<sup>b</sup>Instrumental Analysis and Research Center, Sun Yat-sen University, Guangzhou 510275, China.

\*Corresponding authors: (e-mail) [cescx@mail.sysu.edu.cn](mailto:cescx@mail.sysu.edu.cn) (X. D. Chen) and [cesmq@mail.sysu.edu.cn](mailto:cesmq@mail.sysu.edu.cn) (M. Q. Zhang), (phone & fax) +86-20-84113498; Key Laboratory for Polymeric Composite and Functional Materials of Ministry of Education.

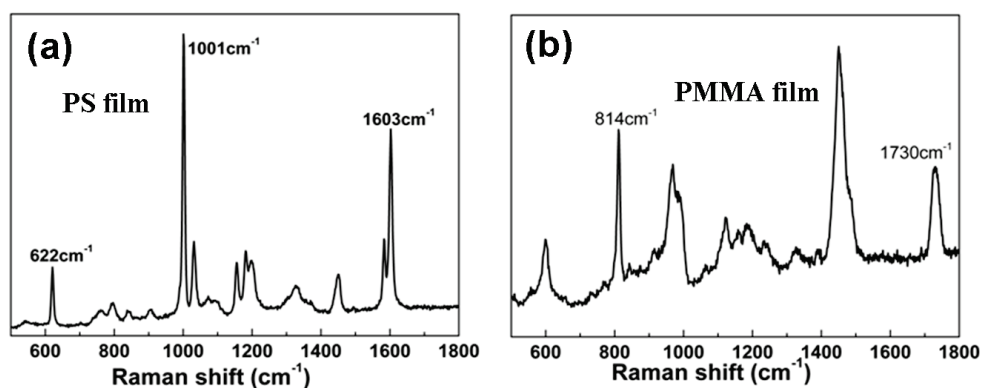

Figure S1 Raman spectra of (a) PS film and (b) PMMA film.

Table S1 Assignments of the Raman vibration spectra of PS and PMMA films

|      | Raman shift (cm <sup>-1</sup> ) | Mode                             | Assignment                                                 |
|------|---------------------------------|----------------------------------|------------------------------------------------------------|
| PS   | 622                             | <i>d</i> (C-C)                   | In-plane ring deformation                                  |
|      | 1001                            | <i>d</i> (C-C)+<br><i>d</i> (CH) | In-plane ring deformation +<br>out-of-plane CH deformation |
|      | 1603                            | <i>v<sub>a</sub></i> (C-C)       | Symmetric stretching vibration of<br>phenyl ring           |
| PMMA | 814                             | <i>v</i> (C=O)                   | Stretching vibration of C=O                                |
|      | 1730                            | <i>v<sub>a</sub></i> (C-O-C)     | Symmetric stretching vibration of<br>C-O-C                 |

*v*, stretching (*a*, symmetric; *as*, asymmetric); *ρ*, rocking; *δ*, bending; *τ*, twisting; *ω*, wagging; *d*, deformation.

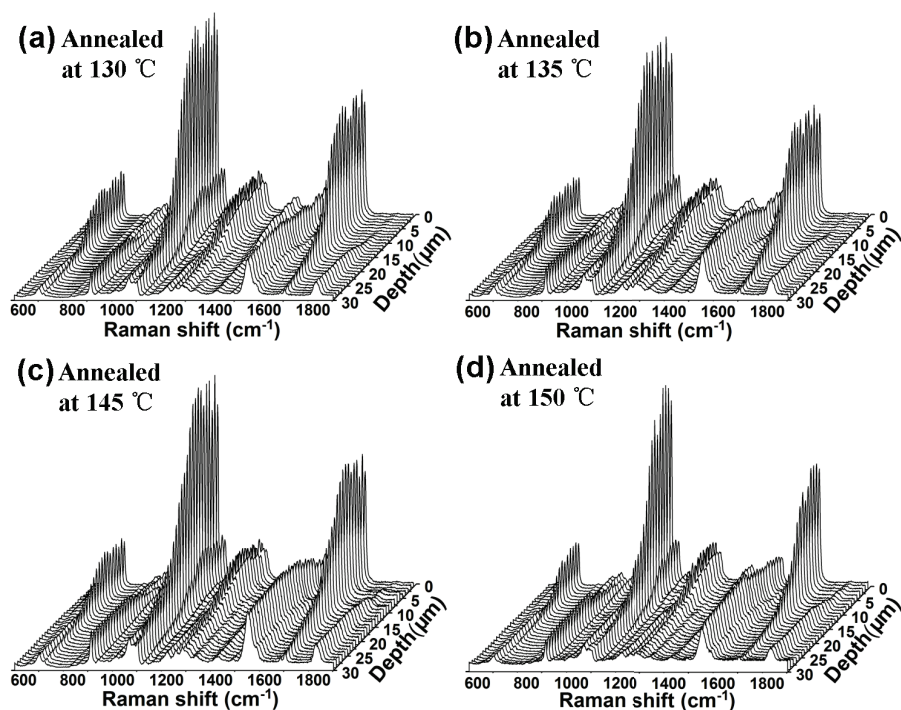

Figure S2 Raman spectra collected at different scanning depths. Annealing temperatures: (a) 130 °C, (b) 135 °C, (c) 145 °C and (d) 150 °C. The as-prepared PS/PMMA binary film is about 30 μm thick (PS ≈ 15 μm, PMMA ≈ 15 μm).

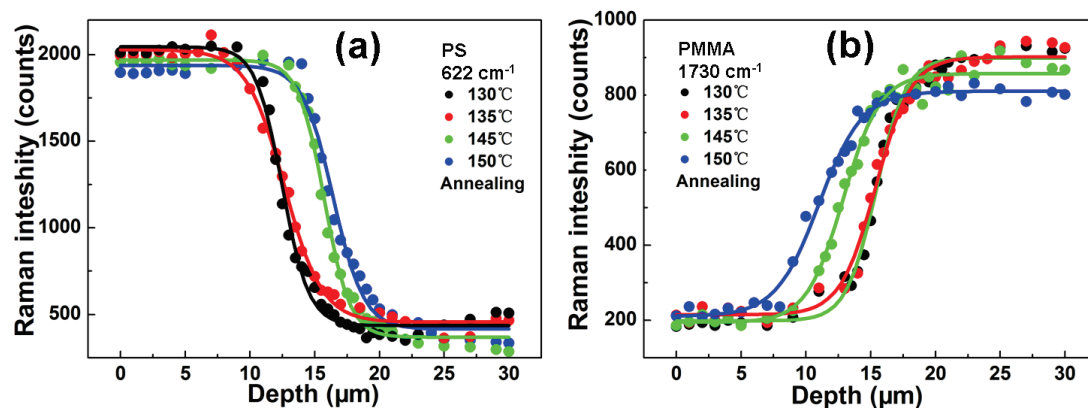

Figure S3 Depth dependence of Raman intensity of annealed PS/PMMA binary film (~30 μm thick) at (a) 622 cm<sup>-1</sup> and (b) 1730 cm<sup>-1</sup>.

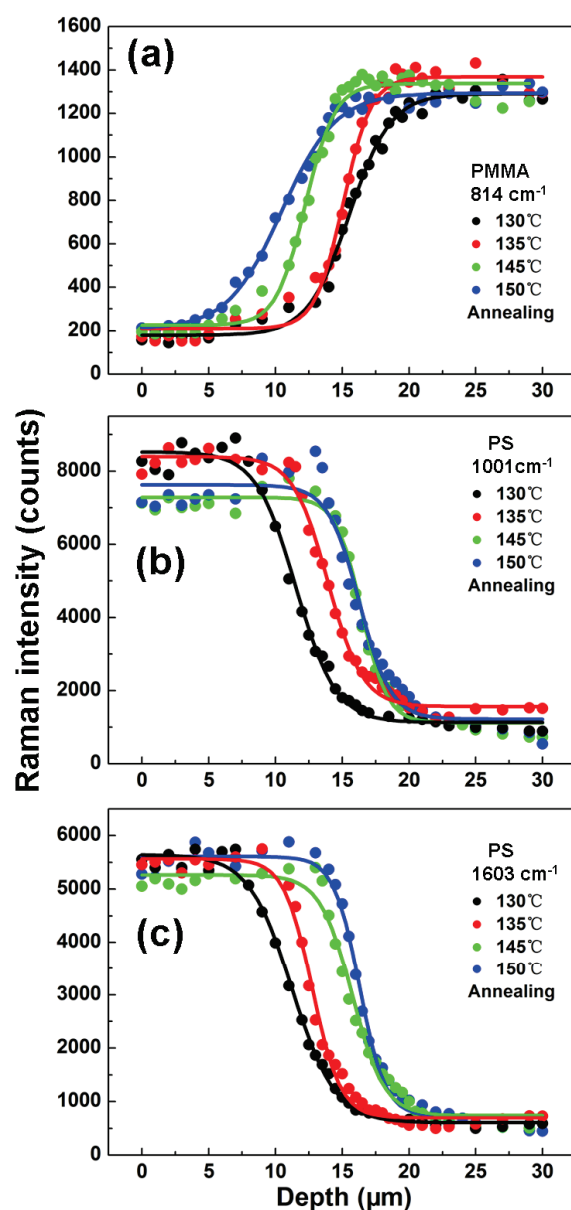

Figure S4 Depth dependence of Raman intensity of annealed PS/PMMA binary film (~30 μm thick) at (a) 814 cm<sup>-1</sup>, (b) 1001 cm<sup>-1</sup> and (c) 1603 cm<sup>-1</sup>.

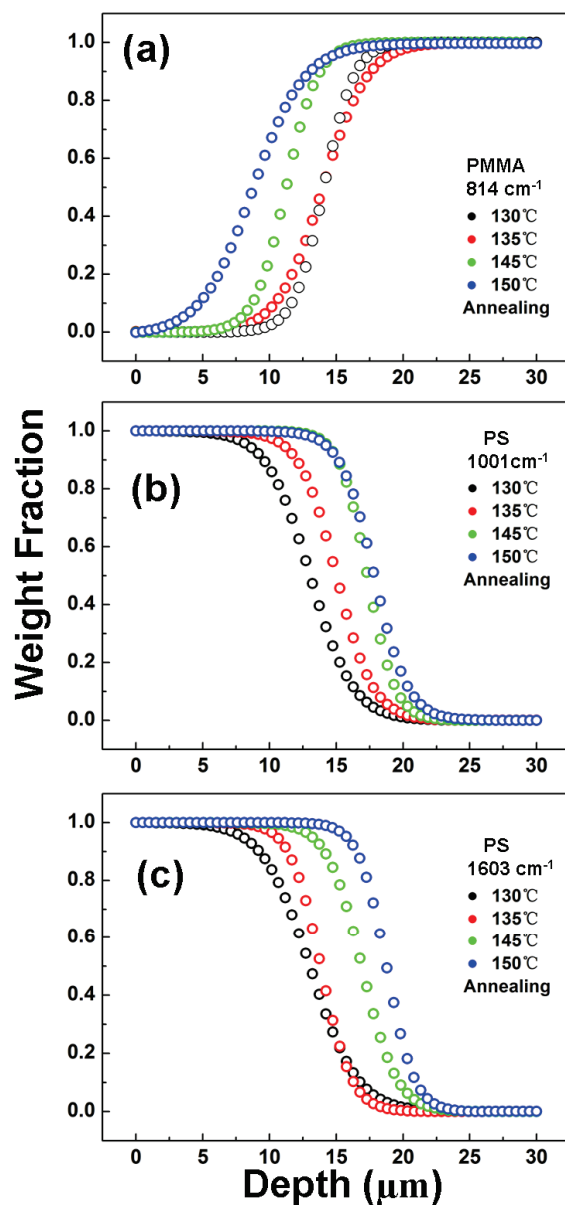

Figure S5 Weight fraction versus scanning depth of (a) PS and (b) PMMA in the annealed PS/PMMA binary film ( $\sim 30 \mu\text{m}$  thick) at (a)  $814 \text{ cm}^{-1}$ , (b)  $1001 \text{ cm}^{-1}$  and (c)  $1603 \text{ cm}^{-1}$ .

Table S2 Tracer diffusion coefficients,  $D^*$ , corresponding to different characteristic Raman shifts estimated from Equation (5)

| Annealing temperature ( $^{\circ}\text{C}$ ) | PS                                                 |                                                    |                                                    | PMMA                                               |                                                    |
|----------------------------------------------|----------------------------------------------------|----------------------------------------------------|----------------------------------------------------|----------------------------------------------------|----------------------------------------------------|
|                                              | $622 \text{ cm}^{-1}$                              | $1603 \text{ cm}^{-1}$                             | $1001 \text{ cm}^{-1}$                             | $814 \text{ cm}^{-1}$                              | $1730 \text{ cm}^{-1}$                             |
| 130                                          | $1.27 \times 10^{-14} \text{ cm}^2 \text{ s}^{-1}$ | $1.22 \times 10^{-14} \text{ cm}^2 \text{ s}^{-1}$ | $1.34 \times 10^{-14} \text{ cm}^2 \text{ s}^{-1}$ | $1.92 \times 10^{-13} \text{ cm}^2 \text{ s}^{-1}$ | $1.97 \times 10^{-13} \text{ cm}^2 \text{ s}^{-1}$ |
| 135                                          | $1.35 \times 10^{-14} \text{ cm}^2 \text{ s}^{-1}$ | $1.39 \times 10^{-14} \text{ cm}^2 \text{ s}^{-1}$ | $1.47 \times 10^{-14} \text{ cm}^2 \text{ s}^{-1}$ | $2.30 \times 10^{-13} \text{ cm}^2 \text{ s}^{-1}$ | $2.28 \times 10^{-13} \text{ cm}^2 \text{ s}^{-1}$ |
| 145                                          | $1.52 \times 10^{-14} \text{ cm}^2 \text{ s}^{-1}$ | $1.57 \times 10^{-14} \text{ cm}^2 \text{ s}^{-1}$ | $1.65 \times 10^{-14} \text{ cm}^2 \text{ s}^{-1}$ | $2.89 \times 10^{-13} \text{ cm}^2 \text{ s}^{-1}$ | $2.93 \times 10^{-13} \text{ cm}^2 \text{ s}^{-1}$ |
| 150                                          | $1.70 \times 10^{-14} \text{ cm}^2 \text{ s}^{-1}$ | $1.79 \times 10^{-14} \text{ cm}^2 \text{ s}^{-1}$ | $1.81 \times 10^{-14} \text{ cm}^2 \text{ s}^{-1}$ | $3.15 \times 10^{-13} \text{ cm}^2 \text{ s}^{-1}$ | $3.12 \times 10^{-13} \text{ cm}^2 \text{ s}^{-1}$ |

Table S3 Transport coefficients estimated according to “slow” and “fast” theories and mutual diffusion coefficients at different Raman shifts under 130°C annealing.

| Raman shift<br>(cm <sup>-1</sup> ) | D <sub>T</sub><br>(slow theory)                        | $\overline{D}_T$<br>(slow theory)                      | D <sub>T</sub><br>(fast theory)                        | $\overline{D}_T$<br>(fast theory)                      | D                                                      |
|------------------------------------|--------------------------------------------------------|--------------------------------------------------------|--------------------------------------------------------|--------------------------------------------------------|--------------------------------------------------------|
| 622                                | 3.16×10 <sup>-11</sup> cm <sup>2</sup> s <sup>-1</sup> | 3.22×10 <sup>-11</sup> cm <sup>2</sup> s <sup>-1</sup> | 6.97×10 <sup>-11</sup> cm <sup>2</sup> s <sup>-1</sup> | 6.98×10 <sup>-11</sup> cm <sup>2</sup> s <sup>-1</sup> | 5.34×10 <sup>-13</sup> cm <sup>2</sup> s <sup>-1</sup> |
| 1001                               | 3.19×10 <sup>-11</sup> cm <sup>2</sup> s <sup>-1</sup> |                                                        | 6.85×10 <sup>-11</sup> cm <sup>2</sup> s <sup>-1</sup> |                                                        | 5.22×10 <sup>-13</sup> cm <sup>2</sup> s <sup>-1</sup> |
| 1603                               | 3.30×10 <sup>-11</sup> cm <sup>2</sup> s <sup>-1</sup> |                                                        | 7.13×10 <sup>-11</sup> cm <sup>2</sup> s <sup>-1</sup> |                                                        | 5.48×10 <sup>-13</sup> cm <sup>2</sup> s <sup>-1</sup> |
